# Supplementary material for: Radial Access for Coronary Angiography Carries Fewer Complications Compared with Femoral Access: A Meta-Analysis of Randomized Controlled Trials
Source: J Clin Med. 2021 May 17;10(10):2163. doi: 10.3390/jcm10102163 (PMC8156941; doi:10.3390/jcm10102163)
Supplement: Supplementary file 1 [file jcm-10-02163-s001.zip › jcm-1175550-supplementary.pdf]

**Supplementary Table S1.** Main clinical, angiographic and procedural characteristics of the included studies.

| Study                                        | Year | TRA<br>(nr) | TFA<br>(nr) | Clinical Syndrome                                                         | Mean Age<br>eyr. |      | Follow<br>Up   | Multicenter | Primary Endpoint                                                                                                                                                 | Primary<br>Statistical<br>Result                                  | Sheath size<br>5-6F/7F | MACE<br>Definition                                  |
|----------------------------------------------|------|-------------|-------------|---------------------------------------------------------------------------|------------------|------|----------------|-------------|------------------------------------------------------------------------------------------------------------------------------------------------------------------|-------------------------------------------------------------------|------------------------|-----------------------------------------------------|
|                                              |      |             |             |                                                                           | TFA              | TRA  |                |             |                                                                                                                                                                  |                                                                   |                        |                                                     |
| <b>ACCESS</b><br><b>Kiemeneij et al [17]</b> | 1997 | 300         | 300         | Stable, ACS                                                               | 61               | 62   | 30 days        | No          | 1.Access site related endpoint<br>2.PTCA-related endpoints                                                                                                       | 1. p < 0.001<br>(radial better)<br>2. p = NS                      | 100%/0%                | Death,<br>MI, Stroke<br>CABG<br>PTCA                |
| <b>Achenbach<br/>et al [28]</b>              | 2008 | 152         | 155         | Suspicious for<br>Coronary artery<br>disease                              | 78               | 78   | 4 days         | No          | 1.The success rate of TR<br>coronary<br>angiography and intervention<br>Occurrence of major<br>complications.<br>2. Minor complica-tions,<br>procedural duration | 1.p < 0.001<br>(radial better)<br>2. p < 0.001<br>(radial better) | 100%/0%                | Death<br>Stroke<br>Vascular<br>access<br>definition |
| <b>Akturk et al [41]</b>                     | 2014 | 408         | 428         | Suspicious for<br>coronary<br>artery disease                              | 59.6             | 60.3 | In<br>Hospital | No          | 1.VAS scores after<br>catheterisation                                                                                                                            | 1.p < 0.0001<br>(Radial better )                                  | -                      | Not defined                                         |
| <b>Andrade<br/>et al [45]</b>                | 2017 | 120         | 120         | NTSEMI<br>Previous CAD                                                    | 62.5             | 63.6 | 30 Days        | No          | 1.Vascular complication at the<br>arterial puncture<br>site 30-days after the procedure.                                                                         | N/S                                                               | -                      | Not defined                                         |
| <b>Benit et al [18]</b>                      | 1997 | 56          | 55          | Symptomatic<br>Ischemic heart<br>disease                                  | 57.7             | 58.2 | 1 month        | No          | Entry site complications<br>(bleeding, haematoma,<br>transfusion, occlusion, surgery)                                                                            | N/S                                                               | NR                     | Death<br>Stent<br>Thrombosis<br>Repeat PTCA         |
| <b>Bhat et al [46]</b>                       | 2017 | 200         | 200         | Primary PCI,<br>Elective coronary<br>Study and elective<br>angioplasties. | 61.8             | 60.6 | In<br>Hospital | No          | 1.Bleeding, access site,<br>Non access site complications.<br>Hospital stay duration<br>Time of doing procedure                                                  | p = 0.0003<br>(radial better)                                     | 100%/0%                | Not defined.                                        |
| <b>Brueck et al [56]</b>                     | 2009 | 512         | 512         | Diagnostic or<br>interventional<br>Cardiac<br>catheterization             | 63.2             | 64.1 | In<br>Hospital | No          | Access Failure, procedural<br>duration,<br>Entry site complication,<br>radiation exposure.                                                                       | p = 0.0008<br>(radial better)                                     | 85%/15%                | Not defined                                         |
| <b>Cooper et al [20]</b>                     | 1999 | 101         | 99          | Diagnostic<br>Cardiac<br>catheterization                                  | 60               | 60   | 1 week         | No          | Access site complication,<br>stroke,<br>median length of stay, bodily                                                                                            | p < 0.0001<br>(radial better)                                     | 100/0%                 | Not defined                                         |

|                                                  |      |      |      |                                                                                                                  |      |      |             |     |                                                                                                                 |                                                       |        |                                                               |
|--------------------------------------------------|------|------|------|------------------------------------------------------------------------------------------------------------------|------|------|-------------|-----|-----------------------------------------------------------------------------------------------------------------|-------------------------------------------------------|--------|---------------------------------------------------------------|
| pain, back pain, walking ability                 |      |      |      |                                                                                                                  |      |      |             |     |                                                                                                                 |                                                       |        |                                                               |
| <b>FARMI</b><br><b>Brasselet et al [26]</b>      | 2007 | 57   | 57   | STEMI, sustained chest pain                                                                                      | 60   | 58   | In Hospital | No  | Peripheral arterial complications                                                                               | p = 0.014 (radial better)                             | 100%0% | Not defined                                                   |
| <b>FERARI</b><br><b>Fastner et al [44]</b>       | 2017 | 200  | 200  | Stable AP<br>Unstable AP<br>NSTEMI, STEMI,<br>Positive viability testing,<br>Control angiography<br>Syncope, HF. | 69   | 71   | 30 Days     | No  | Access site bleeding,<br>Re-hospitalization due to access site bleeding                                         | (p < 0.05) (radial better)                            | N/A    | Death<br>MI<br>Stent thrombosis<br>Stroke                     |
| <b>Gan et al [31]</b>                            | 2009 | 95   | 105  | STEMI                                                                                                            | 53.6 | 52.3 | 6 month     | YES | N/A                                                                                                             | N/A                                                   | -      | Death,<br>Re-Infarction,<br>CABG<br>Access site complication, |
| <b>Hou et al [33]</b>                            | 2010 | 100  | 100  | STEMI                                                                                                            | 64.9 | 66.2 | 30 Days     | No  | MACE<br>Vascular complication                                                                                   | N/S<br>p < 0.01 (radial better)                       | -      | -                                                             |
| <b>Mann et al [27]</b>                           | 1998 | 68   | 77   | STEMI, NSTEMI, ACS                                                                                               | 63   | 62   | In Hospital | No  | Access site complication, Death, CABG, MI                                                                       | N/A                                                   | -      | Not defined                                                   |
| <b>MATRIX</b><br><b>Valgimili et al [43]</b>     | 2015 | 4197 | 4207 | STEMI, NSTEMI ACS                                                                                                | 65.6 | 65.9 | 30 Days     | YES | 1. Composite of all-cause mortality, MI or stroke<br>2. Composite of major bleeding not related to CABG or MACE | p < 0.03 (radial better)<br>p < 0.009 (radial better) | -      | Death,<br>MI<br>Stroke                                        |
| <b>OCEAN RACE</b><br><b>Koltoswki et al [40]</b> | 2014 | 52   | 51   | STEMI                                                                                                            | 61   | 62.8 | In Hospital | NO  | Composite of major and minor bleeding                                                                           | p = 0.238<br>N/S                                      | 100%   | Stroke<br>Death<br>Major bleeding,<br>Sudden Cardiac Arrest   |
| <b>OCTOPLUS</b>                                  | 2004 | 192  | 185  | Stable, NSTEMI,                                                                                                  | 82.6 | 83   | In          | YES | Composite vascular endpoint                                                                                     | p = 0.029                                             | -      | Not defined                                                   |

|                                              |      |      |      |                                    |      |      |             |     |                                                                                                                 |                                                                   |                                                |                                             |
|----------------------------------------------|------|------|------|------------------------------------|------|------|-------------|-----|-----------------------------------------------------------------------------------------------------------------|-------------------------------------------------------------------|------------------------------------------------|---------------------------------------------|
| <b>Louvard et al [23]</b>                    |      |      |      | STEMI, ACS                         |      |      | Hospital    |     | Comprising ≥ of the following (radial better)                                                                   |                                                                   |                                                |                                             |
| <b>RADIAL AMI<br/>Cantor et al [25]</b>      | 2005 | 25   | 58   | STEMI                              | 52   | 58   | 30 Days     | YES | 1.Reperfusion time<br>2.Major bleedin gaccess site complication                                                 | 1.p = 0.04<br>(femoralbetter)<br>2.= NS                           | TRA:100%/0%<br>TFA:88%/12%                     | Not defined                                 |
| <b>RADIAL CABG<br/>Michael et al [39]</b>    | 2013 | 64   | 64   | STEMI                              | 64   | 64   | In Hospital | No  | 1.Volume of radiographic contrast administered During cardiac catheterization<br>2. MACE                        | 1. p < 0.01)<br>(femoralbetter)<br>2.N/S                          | -                                              | MI<br>Recurrent Angina<br>Urgentrepeat TVR. |
| <b>RADIAMI<br/>Chodor et al [32]</b>         | 2009 | 50   | 50   | STEMI                              | 59.9 | 59.1 | In Hospital | No  | Not defined                                                                                                     | N/A                                                               | 100%/0%                                        | Death, MI                                   |
| <b>RADIAMI II<br/>Chodor et al [36]</b>      | 2011 | 49   | 59   | STEMI                              | 62.1 | 57.6 | In Hospital | No  | Not defined                                                                                                     | N/A                                                               | 100%/0%                                        | Death, MI,CABG,TV R                         |
| <b>Reddy et al [22]</b>                      | 2004 | 25   | 25   | Diagnostic Cardiac catheterization | 58   | 64   | 1 week      | No  | 1.Sheath insertion time<br>2.Catherization time<br>3.Hemostazis time<br>4. Fluroscopy time<br>5.Contrast amount | P = N/S                                                           | -                                              | Not defined                                 |
| <b>RIFLE-STEACS<br/>Romangoli et al [37]</b> | 2012 | 500  | 501  | STEMI                              | 65   | 65   | 30 Days     | YES | NACE                                                                                                            | P = 0.003<br>(radial better)                                      | TRA:81.4%/18.6 %<br>TFA:90.8%/9.2%             | Death, MI, Stroke. TLR                      |
| <b>RIVAL<br/>Jolly et al [35]</b>            | 2011 | 3507 | 3514 | STEMI, NSTEMI ACS                  | 62   | 62   | 30 Days     | YES | Death, Myocardial Infarction, Stroke, non-CABG, related major bleeding.                                         | P = 0.50                                                          | TRA:98.6%/1.4%<br>TFA:95.5%/4.5%               | Death, MI, Stroke                           |
| <b>SAFARI-STEMI<br/>May et al [50]</b>       | 2020 | 1136 | 1156 | STEMI                              | 61.6 | 62   | 30 Days     | YES | 1.All cause mortality (bleeding)<br>2. Stroke, Reinfarction, Death                                              | N/S                                                               | -                                              | Not defined                                 |
| <b>SAFE-PCI<br/>Koshy et al [48]</b>         | 2018 | 893  | 894  | STABLE, PCI                        | 65.2 | 64.3 | 72 Hours    | YES | Post procedure bleeding or vascular complications                                                               | p = 0.3<br>(radial better)                                        | -                                              | Not defined                                 |
| <b>Santas et al [429]</b>                    | 2009 | 670  | 335  | STABLE, STEMI                      | 66   | 66   | In Hospital | No  | Percentage of procedure completed using the assigned approach                                                   | p < 0.0001<br>(femoral better)                                    | No                                             | Not defined                                 |
| <b>Scherthaner<br/>Et al [47]</b>            | 2018 | 125  | 125  | STEMI, NSTEMI ACS                  | 61.9 | 62.2 | 30 Days     | YES | 1.Occurrence hematoma<br>2.Local bleeding, the access site pseudoaneurism<br>3. Prolonged hospital stay         | 1.p < 0.0007<br>(radial better)<br>2.p = 0.04)<br>(radial better) | TRA 8.8% /<br>91.2%/0.0% FA<br>0.8%/98.4%/0.8% | Not defined                                 |

|                                           |      |     |     |                                                    |      |      |                |     |                                                                                                                                                 |                                                    |                               |                                                                                 |
|-------------------------------------------|------|-----|-----|----------------------------------------------------|------|------|----------------|-----|-------------------------------------------------------------------------------------------------------------------------------------------------|----------------------------------------------------|-------------------------------|---------------------------------------------------------------------------------|
| <b>Slagboom<br/>Et al [24]</b>            | 2005 | 322 | 322 | STABLE AP,<br>UNSTABLE AP                          | 60   | 60   | 1 month        | No  | 1.Cardiac death<br>2.Emergency CABG<br>3. Myocardial Infarction<br>4.Major entry site complication                                              | N/S                                                | 100%/0%                       | Cardiac death<br>Emergency<br>CABG<br>MI<br>Major entry<br>site<br>complication |
| <b>STEMI RADIAL<br/>Bernat et al [42]</b> | 2013 | 348 | 359 | STEMI                                              | 62.7 | 61.5 | 30 Days        | YES | 1.Major bleeding and vascular<br>access<br>site complication                                                                                    | p < 0.0001<br>(radial better)                      | TRA 100%/0%<br>TFA 92.2%/0.8% | Death<br>MI<br>Stroke                                                           |
| <b>SURF<br/>Nguen et al [59]</b>          | 2019 | 679 | 662 | STEMI<br>NSTE ACS<br>STABLE AP<br>UNSTABLE AP      | 65   | 65   | 30 Days        | No  | 1.ACUITY<br>2.Major Bleeding<br>3.MACE                                                                                                          | (p = 0.013)<br>(radial better)                     | NR                            | Death<br>Stroke<br>Myocardial<br>Infarction<br>Urgent TLR                       |
| <b>TEMPURA<br/>Saito et al [21]</b>       | 2003 | 77  | 72  | STEMI                                              | 66   | 67   | In<br>Hospital | No  | MACE                                                                                                                                            | p = 0.412)<br>(similar )                           | NR                            | Death<br>MI<br>TLR                                                              |
| <b>Wang et al [38]</b>                    | 2012 | 60  | 59  | STEMI                                              | 59.8 | 60.2 | In<br>Hospital | No  | 1.Puncture time,<br>cannulation time,<br>and total procedure time.<br>2.Vascular access site<br>complication,<br>minor bleeding, major bleeding | p < 0.001<br>(Radial better )                      | NR                            | Death<br>Reinfarction<br>TVR                                                    |
| <b>Yan et al [27]</b>                     | 2008 | 57  | 46  | Acute Myocardial<br>Infarction                     | 70.3 | 71.4 | 30 Days        | No  | 1.Vascular access site<br>2.MACE                                                                                                                | 1.P < 0.05<br>(radial better)<br>2.N/S             | -                             | Death<br>Reinfarction<br>TVR                                                    |
| <b>Ziakas et al [34]</b>                  | 2010 | 27  | 29  | Clinical Indication<br>for Coronary<br>angiography | 68.2 | 64.7 | In<br>hospital | No  | 1.MACE<br>2.Bleeding<br>3.Access site complication                                                                                              | 1.N/S<br>2. N/S<br>3. P = 0.086<br>(radial better) | N/R                           | Death<br>Stroke<br>TVR                                                          |

ACS = acute coronary syndrome; CABG = coronary artery bypass grafting; FARMi = Five French Arterial Access With reopro in Myocardial Infarction; MACE = major adverse cardiovascular event(s); MATRIX = Minimizing Adverse Haemorrhagic Events by Transradial Access Site and Systemic Implementation of Angiox; NA = not available; NACE = net adverse clinical event(s); NSTE = non-ST-segment elevation; OCEAN RACE = access for percutaneous coronary intervention in STEMI: radial vs. femoral-prospective; OUTCLAS = Outpatient Coronary Low-Profile Angioplasty Study; PTCA = percutaneous transluminal coronary angioplasty; RADIAMI = Radial Versus Femoral Approach for Percutaneous Coronary Interventions in

PatientsWithAcuteMyocardialInfarction; RIFLE-STEACS = Radial VersusFemoralRandomizedInvestigation in ST-ElevationAcuteCoronarySyndrome; RIVAL  
 = Radial vsFemoral Access forCoronaryIntervention; SAFE-PCI = Studyof Access Site forEnhancementof PCI forWomen; STEMI = ST-segment  
 elevationmyocardialinfarction; STEMI RADIAL = ST ElevationMyocardialInfarctiontreated by RADIAL or femoralapproach; TEMPURA = Test  
 forMyocardialInfarction by ProspectiveUnicenterRandomizationfor Access Sites; TFA = transfemoralaccess; TRA = transradialaccess; AMI = Acute  
 Myocardial Infarction; MACE = major adverse cardiac events; MI = myocardial infarction; NA = not applicable; No. = Numbers; NR = not reported; PCI =  
 percutaneous coronary intervention; RADIAL AMI = Radial  
 versusfemoralaccessforemergentpercutaneouscoronaryinterventionwithadjunctglycoproteinIIb/IIIainhibition in acutemyocardialinfarction; RADIAMI =  
 Radial VersusFemoralApproachforPercutaneousCoronaryInterventions in PatientsWithAcuteMyocardialInfarction;TEMPURA = Test  
 forMyocardialInfarction by ProspectiveUnicenterRandomizationfor Access Sites; TLR = targetlesionrevascularization; TVR = targetvesselrevascularization;  
 MI:Myocardial Infarction

### A) All-cause mortality

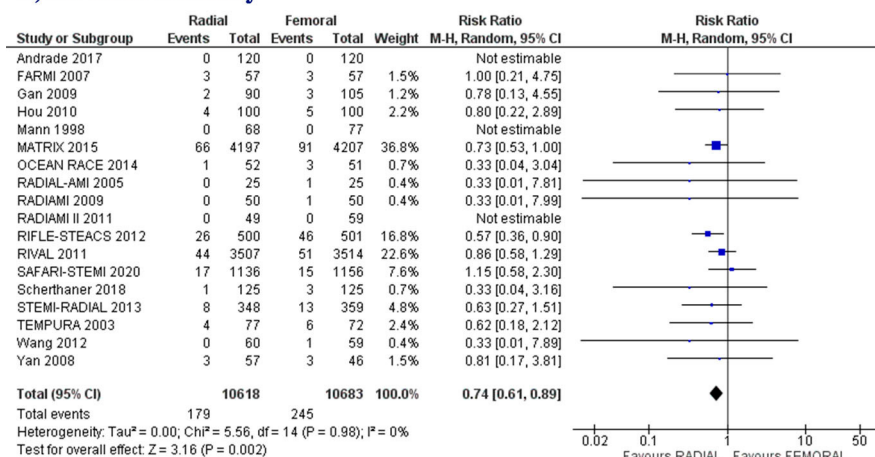

### B) Major bleeding

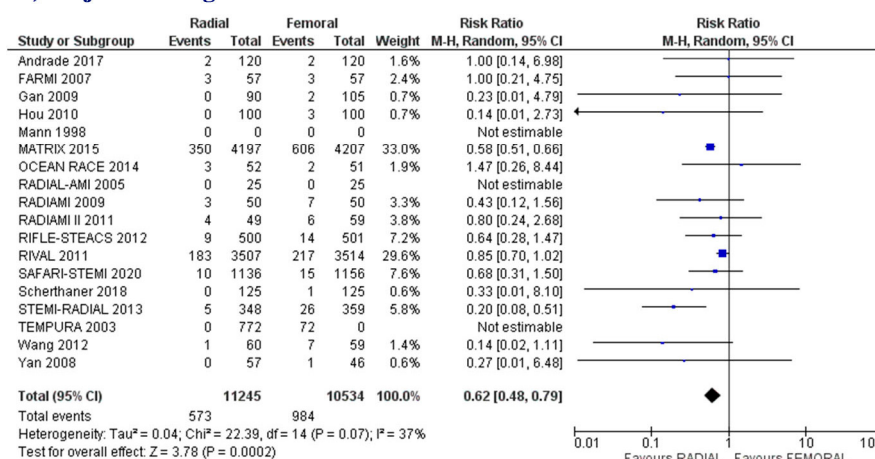

**Supplementary Figure S1.** Risk of all-cause mortality (A) and major bleeding (B) at follow-up: Radial vs. Femoral, in patients with acute coronary syndrome.

## A) MACE

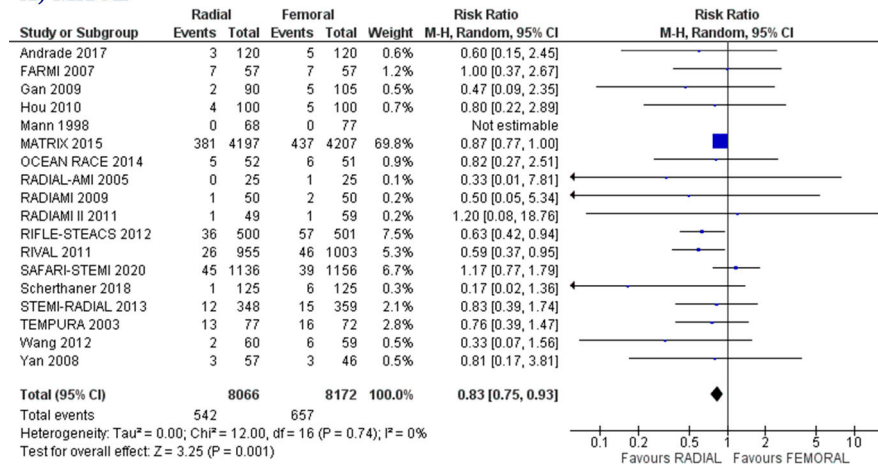

## B) Major vascular complications

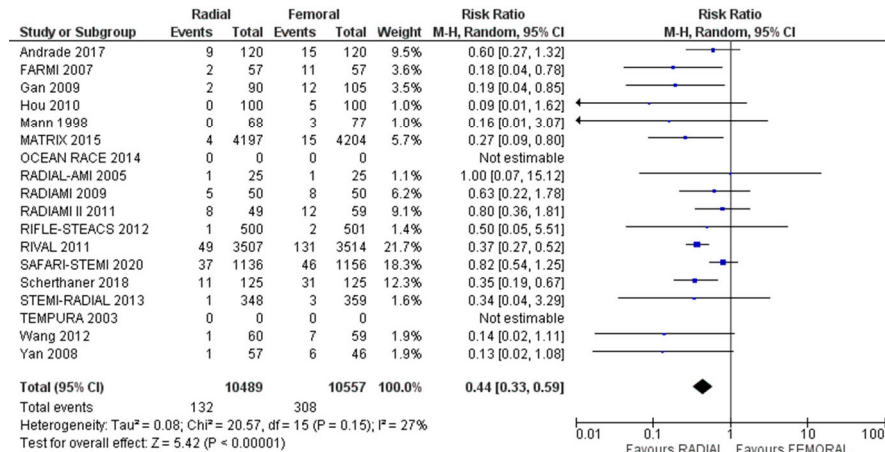

### C) Myocardial infarction

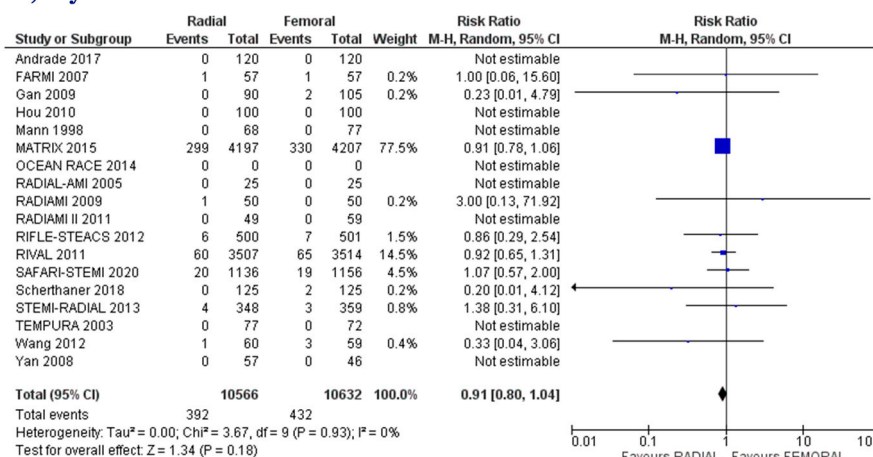

### D) Stroke

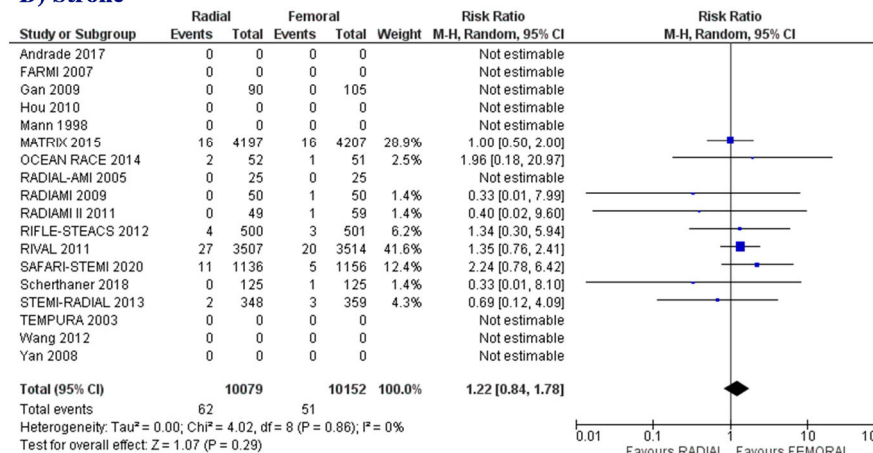

**Supplementary Figure S2.** Risk of MACE (A) and major vascular complications (B) at follow-up: Radial vs. Femoral, in patients with acute coronary syndrome. Risk of myocardial infarction (C) and stroke (D) at follow-up: Radial vs. Femoral, in patients with acute coronary syndrome.

### A) All-cause mortality

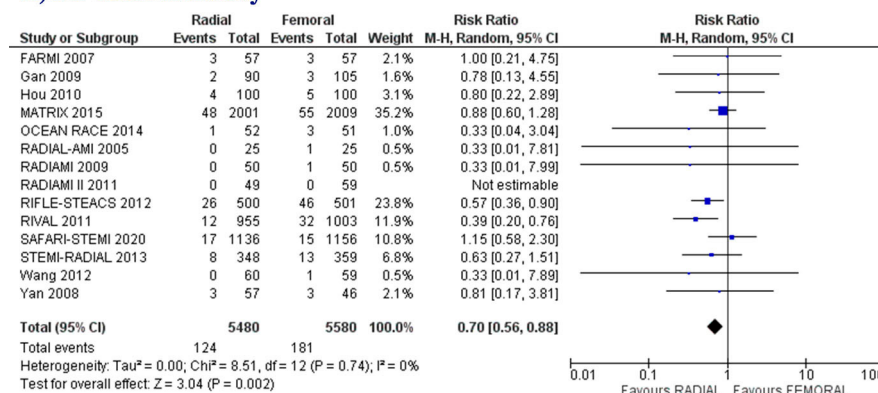

### B) Major bleeding

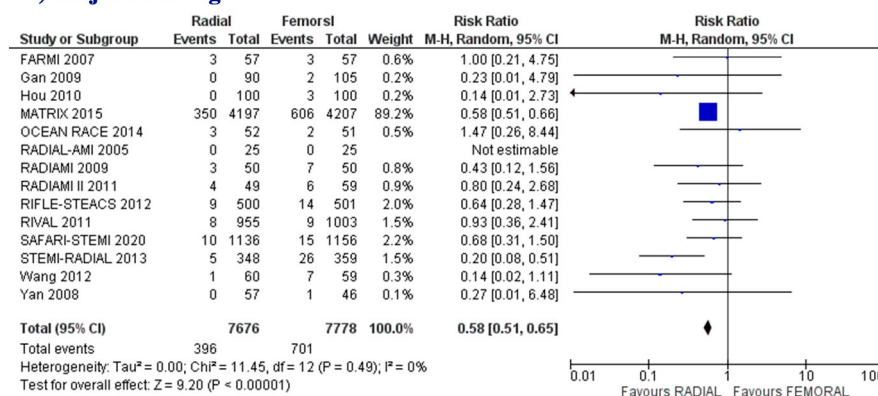

**Supplementary Figure S3.** Risk of all causes mortality (A) and major bleeding (B) at follow-up: Radial vs. Femoral, in patients with STEMI.

### A) MACE

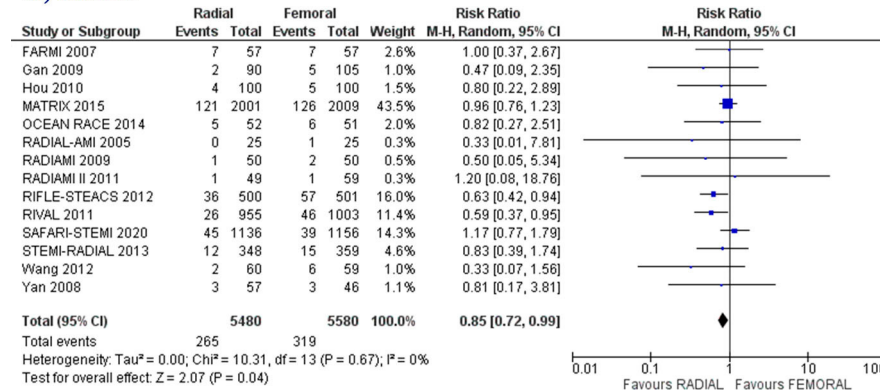

### B) Major vascular complications

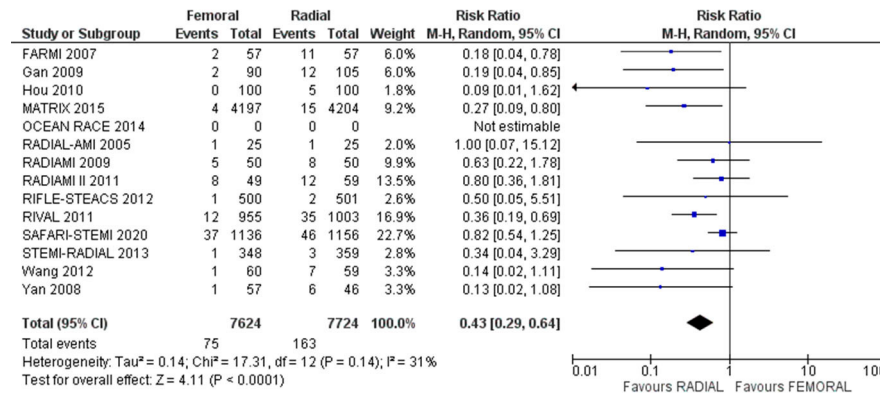

### C) Myocardial infarction

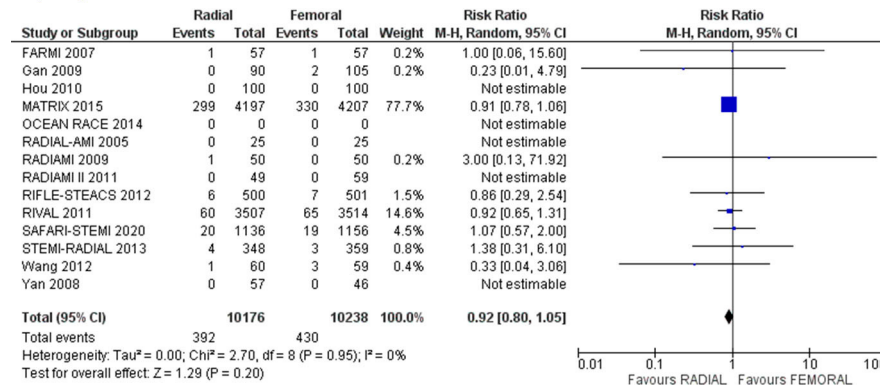

### D) Stroke

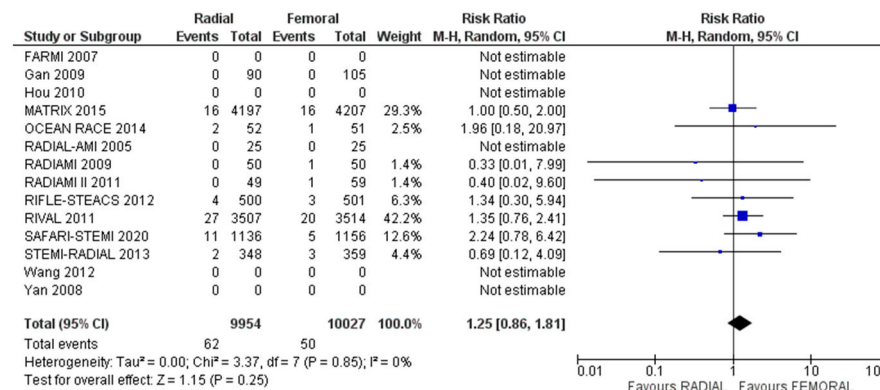

**Supplementary Figure S4.** Risk of MACE (A) and major vascular complications (B) at follow-up: Radial vs. Femoral, in patients with STEMI. Risk of myocardial infarction (C) and stroke (D) at follow-up: Radial vs. Femoral, in patients with STEMI.

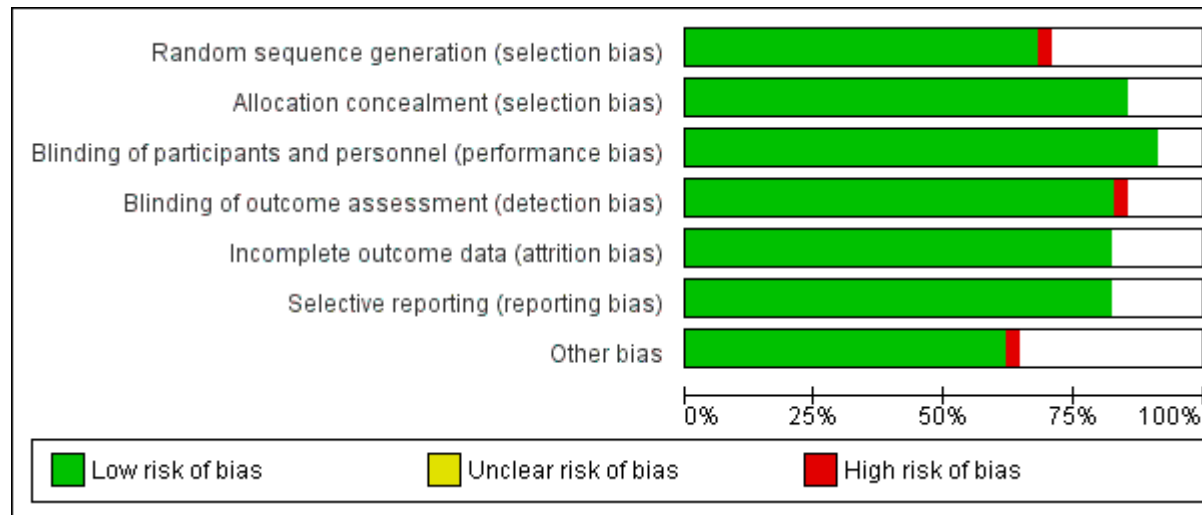

**Supplementary Figure S5.** Risk of bias pf the included studies.
